# Supplementary material for: Application of Composts’ Biochar as Potential Sorbent for Reduce VOCs Emission during Food Waste Storage
Source: Preprints.org preprint supplement (doi:10.20944/preprints202309.0169.v1), 2023-09-04
Supplement: Supplementary file 1 [file supplementary]

## Sheet: read me
	The table of content
	Sheet no.	Name of the content
	1	Read me
	2	Table S1. Table S1. Information regarding the emissions and hazards of VOCs emitted from produced composts' biochar and relevant details about identified substances (based on National Library of Medicine).
	3	Table S2. Information regarding the hazards of VOCs emitted during storage of kitchen waste with and without composted' biochar addition and relevant details about identified substances (based on National Library of Medicine). Table A1 displays the measured emission levels of identified coumpands.

## Sheet: sheet 1
	Table S1. Information regarding the emissions and hazards of VOCs emitted from produced composts' biochar and relevant details about identified substances (based on National Library of Medicine: https://pubchem.ncbi.nlm.nih.gov/).
	No.	Compound Name, International Union of Pure and Applied Chemistry (IUPAC)	Identification of Hazards	Other relevant detailed information	VOCs mean emissions. µg∙kg-1 d.m.	Category
						plesent odor	unplesent odor	role in metabolism	used us agricultural chemicals
	1	Hexane, 2,3,3-trimethyl-	Flammable, irritation	Flammable liquid and vapor, Causes skin irritation, Causes serious eye irritation, May cause respiratory irritation	158.5
	2	Pent-4-yn-3-one, 2,2-dimethyl-	-	-	118.2
	3	unknown	-	-	553.3
	4	Bicyclo[2.1.1]hex-2-ene, 2-ethenyl-	-	-	444.7
	5	1,3-Cyclopentadiene, 5-(1-methylethylidene)-	Flammable, Health Hazard	Flammable liquid and vapor. May be fatal if swallowed and enters airways.	358.9
	6	Hexane, 3-ethyl-3-methyl-	-	-	18.7
	7	D-.alpha.-Methylbenzyl isothiocyanate	Irritation, Acute toxicity	Acute toxicity – oral and dermal, causes skin irritation, may cause an allergic skin reaction, causes serious eye irritation, May cause respiratory irritation	66.6
	8	unknown	-	-	64.7
	9	Octane, 3-methyl-	Flammable, Irtitant, Health Hazard, Enviromental Hazard	Extremely flammable liquid and vapor. May cause respiratory irritation. May cause drowsiness or dizziness. May be fatal if swallowed and enters airways. Very toxic to aquatic life with long lasting effects	21.3
	10	Benzene <ethyl->	Flammable, Irtitant, Health Hazard	Fatal if swallowed. Causes damage to organs through prolonged or repeated exposure.	92.0
	11	1-Hepten-5-yne, 2-methyl-3-methylene-	-	-	178.1
	12	3-Hexanone, 2,2-dimethyl-	Irritant, Flammable	Causes skin irritation. Causes serious eye irritation.	32.8
	13	Octane, 3,5-dimethyl-	Flammable	-	25.7
	14	Phenol	Corrosive, Acute Toxic	Toxic if swallowed. Toxic in contact with skin. Toxic if swallowed. Toxic in contact with skin. Causes severe skin burns and eye damage. Toxic if inhaled. Suspected of causing genetic defects.	44.3
	15	2,3-Heptadien-5-yne, 2,4-dimethyl-	-	-	152.3
	16	Nonane	Flammable, Irritant, Health/Enviromental Hazard	Flammable liquid and vapor. May be fatal if swallowed. Causes skin irritation. Very toxic to aquatic life with long lasting effects. Causes serious eye irritation. Harmful if inhaled, May cause drowsiness or dizziness. Gasoline-like odor.	20.2		x
	17	Octane, 2,3,6-trimethyl-	-	-	50.4
	18	Octane, 2,4,6-trimethyl-	-	-	31.5
	19	Octane, 2,5,6-trimethyl-	-	-	63.1
	20	Cyclopentene <3,5-dimethylene-1,4,4-trimethyl->	-	-	103.2
	21	Cyclobutane, 1,2-bis(1-methylethenyl)-, trans-	-	-	40.9
	22	Octane, 2,3,6,7-tetramethyl-		It has a role as a bacterial metabolite, a plant metabolite and a fungal metabolite.	88.1			x
	23	Octane, 3,4,5,6-tetramethyl-	-	-	3.6
	24	Octane, 2,3,3-trimethyl-	-	-	144.3
	25	Octane, 3-ethyl-	Flammable	Highly Flammable liquid and vapor.	17.8
	26	Octane, 2,3,3-trimethyl-	-	-	40.0
	27	p-Methylbenzyl isothiocyanate	Corrosive, Irritant	Harmful if swallowed. Harmful in contact with skin. Causes severe skin burns and eye damage. Causes skin irritation. Causes serious eye irritation. May cause respiratory irritation	56.7
	28	1,3-Cyclopentadiene, 1,2,3,4-tetramethyl-5-methylene-	-	-	25.6
	29	Nonane, 3,7-dimethyl-	Health Hazard	Neurotoxin - Acute solvent syndrome	25.8
	30	Decane <n->	Flammable, Health Hazard	Flammable liquid and vapor. May be fatal if swallowed and enters airways.	73.0
	31	Tetracyclo[4.2.1.0(3,7).0(2,9)]non-4-ene, 4-butyl-	-	-	37.5
	32	1-Methyl-2-phenylcyclopropane	-	-	61.1
	33	Decane, 3-methyl-	Irritant, Health Hazard May	Have anesthetic effects (drowsiness, dizziness, and headache). Neurotoxin - Acute solvent syndrome.	16.5
	34	Azulene	Hazardous to the aquatic environment	Toxic to aquatic life with long lasting effects.	208.1
	35	Undecane	Health hazard	May be fatal if swallowed and enters airways. Production: Fatty Acyls [FA] -> Hydrocarbons.	83.5
	36	Decane, 2,3,5-trimethyl-	-	Production: Fatty Acyls [FA] -> Hydrocarbons.	53.8
	37	Decane, 2,3,7-trimethyl-	-	Production: Fatty Acyls [FA] -> Hydrocarbons	12.5
	38	Undecane, 3-methyl-	Health hazard	May be fatal if swallowed and enters airways	15.7
	39	Decane, 2,3,5,8-tetramethyl-	-	Metabolite observed in cancer metabolism. It has a role as a human metabolite.	20.0			x
	40	Undecane, 2-methyl-	Health hazard	May be fatal if swallowed and enters airways	26.8
	41	Nonane, 3-methyl-5-propyl-	-	-	70.0
	42	Nonane, 2-methyl-5-propyl-	-	-	19.1
	43	Bicyclo[4.4.1]undeca-1,3,5,7,9-pentaene	-	-	39.3
	44	Dodecane <n->	Health hazard	Dodecane may be harmful if inhaled,swallowed, or absorbed through the skin. It can be irritating to mucous membranes. Dodecane is a component of gasoline and is used as solvent, in organic synthesis, in jet fuel research, as a distillation chaser, and in the rubber and paper processing industries.	19.8
	45	Decane, 3-ethyl-3-methyl-	-	It has a role as a volatile oil component, a plant metabolite and a bacterial metabolite.	62.6			x
	46	Dodecane, 4,6-dimethyl-	-	Metabolite observed in cancer metabolism. It has a role as a human metabolite. Production: Fatty Acyls [FA] -> Hydrocarbons	48.0
	47	Tetradecane <n->	Health hazard	May be fatal if swallowed and enters airways. It has a role as a plant metabolite and a volatile oil component.	38.7			x
	48	Longifolene	Irritant, Health Hazard, Enviromental Hazard	May be fatal if swallowed and enters airways. May cause an allergic skin reaction. Very toxic to aquatic life with long lasting effects.	13.1				x
	49	Caryophyllene <(E)->	Irritant, Health Hazard	May be fatal if swallowed and enters airways. May cause an allergic skin reaction. It has a role as a non-steroidal anti-inflammatory drug, a fragrance, a metabolite and an insect attractant. It is an enantiomer of a (+)-beta-caryophyllene.	0.0
	50	Tetradecane, 3-methyl-	-	-	18.4
	51	Pentadecane <n->	Health Hazard	May be fatal if swallowed and enters airways. It is used in organic synthesis and as solvent. It is also used for the production of both ionic and nonionic detergents.	21.4

## Sheet: sheet 2
	Table S2. Information regarding the hazards of VOCs emitted during storage of kitchen waste with and without composted' biochar addition and relevant details about identified substances (based on National Library of Medicine: https://pubchem.ncbi.nlm.nih.gov/). Table A1 displays the measured emission levels of identified coumpands.
	No.	Compound Name,	Identification of Hazards	Other relevant detailed information	Category
		International Union of Pure and Applied Chemistry (IUPAC)			plesent odor	unplesent odor	role in metabolism	used us agricultural chemicals
	1	Butyric acid	Corrosive	Causes severe skin burns and eye damage. It has a role as a Mycoplasma genitalium metabolite and a human urinary metabolite. It is a straight-chain saturated fatty acid and a fatty acid 4:0. Have an unpleasant odor that occurs in butter and animal fat as the glycerol ester.		x
	2	unknown	-	-
	3	Valeric acid	Causes severe skin burns and eye damage.	Harmful to aquatic life with long lasting effects. Corrosive to metals and tissue. It has a role as a plant metabolite. Have penetrating unpleasant odor.		x	x
	4	3-Hexen-1-ol, (3Z)-	Flammable, Irritant	Used as a flavourant in tea. It has a role as an insect attractant, a plant metabolite and a fragrance.			x
	5	2-Hexen-1-ol, (E)-	Flammable, Irritant	It has a role as a plant metabolite.			x
	6	Hexanol <n->	Irritant	It has a role as a plant metabolite. Have a odour of freshly mown grass.	x		x
	7	unknown acid	-	-
	8	unknown	-	-
	9	n-Butyl ethen	-	-
	10	Methyl allyl disulfide	Flammable, Irritant	It has a role as a plant metabolite and a volatile oil component.			x
	11	Hexanoic acid, methyl ester	Flammable	It has a role as a plant metabolite and a flavouring agent.			x
	12	Disulfide <methyl-, propyl->	Flammable, Irritant	Flammable liquid and vapor. Causes skin irritation. Causes serious eye irritation. Harmful if inhaled. May cause respiratory irritation.
	13	Pinene <alpha->	Flammable, Irritant, Health Hazard, Enviromental Hazard,	Flammable liquid and vapor. Harmful if swallowed. May be fatal if swallowed and enters airways . Causes skin irritation. May cause an allergic skin reaction. Very toxic to aquatic life with long lasting effect. It is found in the oils of many species of many coniferous trees, notably the pine. It is also found in the essential oil of rosemary (Rosmarinus officinalis).
	14	2-Propanol, 1-butoxy-	Irritant	Causes skin irritation. Causes serious eye irritation
	15	Benzaldehyde	Enviromental Hazard	The primary hazard is to the environment. Immediate steps should be taken to limit spread to the environment. Easily penetrates the soil to contaminate groundwater and nearby waterways. Used in flavoring and perfume making. It has a role as a flavouring agent, a fragrance, an odorant receptor agonist, a plant metabolite. Have bitter almond odor.	x		x
	16	2-Hepten-1-ol, (2E)-	Flammable, Irritant	-
	17	Heptanol <n->	-	Production: Food additives -> Flavoring Agents. Fatty Acyls [FA] -> Fatty alcohols. Have a weak alcohol odor.	x
	18	Hexanoic acid	Corrosive, Acute Toxic	Contact may severely irritate skin, eyes and mucous membranes. May be toxic by ingestion, inhalation and skin absorption. Used to make perfumes. Caproic acid is a metabolite found in or produced by Escherichia coli (strain K12, MG1655). Have an unpleasant odor.		x	x
	19	Furan <2-pentyl->	-	-
	20	Hept-5-en-2-ol <6-methyl->	-	-
	21	3-Octanol	Irritant	It has a role as a metabolite.			x
	22	Octanal <n->	Flammable, Irritant, enviromental Hazard	Used in making perfumes and flavorings. It has a role as a plant metabolite. Have a strong fruity odor.	x
	23	Carene <delta-3->	Flammable, Irritant, enviromental Hazard	Have a a sweet, turpentine-like odor	x
	24	Acetic acid, hexyl ester	Enviromental Hazard	A moderate fire risk. Inhalation may cause adverse effects. When heated to high temperatures emits acrid smoke and fumes. Used as a solvent and as a propellant in aerosols. It has a role as a metabolite. Have a mild sweet odor.	x			x
	25	Limonene	Flammable, Irritant, enviromental Hazard	Used as a solvent for rosin, waxes, rubber; as a dispersing agent for oils, resins, paints, lacquers, varnishes, and in floor waxes and furniture polishes. It has a role as a human metabolite. Have a odor of lemon.	x			x
	26	Hexanol <2-ethyl->	Irritant	Production: Food Additives
	27	Benzenemethanol	Irritant	Contact may irritate skin, eyes, and mucous membranes. May be slightly toxic by ingestion. Used to make other chemicals. It has a role as a solvent, a metabolite, an antioxidant and a fragrance. Have a pleasant odor.	x		x
	28	Benzeneacetaldehyde	Corrosive, Irritant	It has a role as a human metabolite, a Saccharomyces cerevisiae metabolite, an Escherichia coli metabolite and a mouse metabolite.			x
	29	2-Octenal, (2E)-	Irritant	It has a role as an antifungal agent and a volatile oil component.				x
	30	2-Octen-1-ol, (2E)-	Irritant	It has a role as a flavouring agent and a fragrance.
	31	Octanol <n->	Flammable, Enviromantal Hazard	It has a role as a volatile oil component and a plant metabolite. Have a It has a pungent odor.		x	x
	32	Heptanoic acid	Corrosive	Very corrosive. Contact may likely burn skin, eyes, and mucous membranes. May be toxic by ingestion, inhalation and skin absorption. Used in the preparation of esters for the fragrance industry, and as an additive in cigarettes. It has a role as a plant metabolite. Have a pungent odor (odour of some rancid oils).		x	x
	33	Disulfide <allyl->	-	-
	34	Linalool	Irritant	It has a role as a plant metabolite, a volatile oil component, an antimicrobial agent and a fragrance.
	35	Nonanal <n->	Irritant	Metabolite observed in cancer metabolism. It has a role as a human metabolite and a plant metabolite. Have a rose-orange odor	x
	36	Disulfide <dipropyl->	-	-
	37	Benzeneethanol	Irritant	It has a role as a fragrance, a Saccharomyces cerevisiae metabolite, a plant metabolite, an Aspergillus metabolite and a plant growth retardant. Have a pleasant floral odor.	x		x
	38	unknown	-	-
	39	Octanoic acid, methyl ester	Irritant	Used to make other chemicals. It has a role as a metabolite.			x
	40	Camphor	Flammable, Irritant, Health Hazard	Used to make moth proofings, pharmaceuticals, and flavorings. Have a strong mothball-like odor.		x		x
	41	Octanoic acid	Corrosive	Corrosive to metals and tissue. It has a role as an antibacterial agent, a human metabolite and an Escherichia coli metabolite. Have a slightly unpleasant rancid-like odor.	x
	42	Decanal <n->	Irrinant	It has a role as an antifungal agent, a fragrance and a plant metabolite. Have a a pleasant odor.	x
	43	Benzothiazole	Acute Toxic, Irritant	It has a role as a plant metabolite, a xenobiotic and an environmental contaminant.
	44	Nonanoic acid	Irritant	Has antifungal properties, and is also used as a herbicide as well as in the preparation of plasticisers and lacquers. It has a role as an antifeedant, a plant metabolite.			x	x
	45	Undecan-2-one	Enviromental Hazard	It has a role as a rodenticide and a plant metabolite.			x	x
	46	Decanoic acid, methyl ester	Enviromental Hazard	-
	47	unknown	-	-
	48	Triacetin	-	It has fungistatic properties (based on release of acetic acid) and has been used in the topical treatment of minor dermatophyte infections. It has a role as a plant metabolite, a solvent, a fuel additive, an adjuvant, a food additive carrier, a food emulsifier, a food humectant and an antifungal drug.			x	x
	49	n-Decanoic acid	Irritant	Used to make esters for perfumes and fruit flavors and as an intermediate for food-grade additives.
	50	Butanoic acid, octyl ester	-	It has a role as a plant metabolite.			x
	51	Copaene <alpha->	-	-
	52	Longipinene<beta->	Flammable, Irritant, Health Haazard	It has a role as a plant metabolite.			x
	53	IS	-	-
	54	gamma.-Elemene	-	-
	55	Himachalene <alpha->	-	-
	56	trans-Geranylacetone	-	It has a role as a flavouring agent, a fragrance, a volatile oil component and a plant metabolite.
	57	Dodecanol	Irritant, Enviromental Hazard	It is registered for use in apple and pear orchards as a Lepidopteran pheromone/sex attractant, used to disrupt the mating behaviour of certain moths whose larvae destroy crops. It has a role as a cosmetic, a pheromone, an insect attractant, a plant metabolite and an insecticide. Have a sweet odor.	x			x
	58	Phthalate <diethyl->	Irritant, Enviromental Hazard	Severely irritates eyes and mildly irritates skin. Primary hazard is to the environment. Spread to the environment should be immediately stopped. Easily penetrates soil, contaminates groundwater and nearby waterways. This synthetic substance is commonly used to make plastics more flexible. Used in the manufacture of perfumes, plastics, mosquito repellents and many other products. Have bitter, dis…		x	x
	59	Lactate <ethyl->	Flammable, corrosive, Irritant	-
	60	Benzene <ethyl->	Flammable, Irritant	It has a role as a polar aprotic solvent, an EC 3.4.19.3 (pyroglutamyl-peptidase I) inhibitor, a metabolite and a Saccharomyces cerevisiae metabolite. Have a fruity odor.	x
	61	Isoamyl acetate		It has a role as a metabolite and a Saccharomyces cerevisiae metabolite. Have a banana odor.	x
	62	o-Xylene	Flammable, Irritant	Have a sweet odor.	x
	63	Heptan-2-ol	Flammable, Irritant	Moderately toxic. Used as a solvent for various resins and as a flotation agent for ore processing. Have a mild alcohol odor.	x
	64	Hexanoate <methyl->	Flammable	It has a role as a plant metabolite and a flavouring agent.			x
	65	1-Octen-3-ol	Irritant, Enviromental Hazard	It is a major volatile compound present in many mushrooms and fungi. It has a role as an insect attractant, a volatile oil component, a fungal metabolite and an antimicrobial agent.				x
	66	Caproic acid	Corrosive, Acute Toxic	Contact may severely irritate skin, eyes and mucous membranes. May be toxic by ingestion, inhalation and skin absorption. Used to make perfumes. It has a role as a human metabolite and a plant metabolite. Have a unpleasant odor		x
	67	Thiophen-3-one <dihydro-, 2-methyl->	-	-
	68	Pseudocumene	Flammable, Irritant, Enviromental Hazard	Vapors irritate eyes, throat, and nose. Used in dyes and pharmaceuticals. It has a role as a neurotoxin.	x
	69	Cymene <para->	Flammable, Acute Toxic, Health Hazard. Enviromental Hazard	It has a role as a plant metabolite, a volatile oil component and a human urinary metabolite. Have a mild pleasant odor.	x		x
	70	Cresol <ortho->	Corrosive, Acute Toxic	Toxic by ingestion and/or skin absorption. Causes burns to skin, eyes and mucous membranes. It is a minor urinary metabolite of toluene. It has a role as a human xenobiotic metabolite. Have a phenol-like odor.
	71	Cresol<meta->	Corrosive, Acute Toxic	Have a sweet tarry odor.		x
	72	Disulfide <allyl->	-	-
	73	Caprylonitrile	-	-		x
	74	Guaiacol	Irrinant, Enviromental Hazard	Used medicinally as an expectorant. Used, because of its anti-oxidant properties, as an anti-skinning agent for paints. It has a role as an expectorant, a disinfectant, a plant metabolite and an EC 1.1.1.25 (shikimate dehydrogenase) inhibitor.				x
	75	2-Nonanone	Irritant	It has a role as a plant metabolite.			x
	76	Caprylic acid	Corrosive	It has a role as an antibacterial agent, a human metabolite and an Escherichia coli metabolite. Have a mild mild odor.	x
	77	Benzeneacetic acid, methyl ester	-	-
	78	Naphthalene	Irritant, Health Hazard, Enviromental Hazard	The major commercial use of naphthalene is in the manufacture of polyvinyl chloride (PVC) plastics. Its major consumer use is in moth repellents and toilet deodorant blocks. Have a strong, but not unpleasant smell.	x			x
	79	Octanoic acid, ethyl ester	-	It has a role as a metabolite.	x		x
	80	Tridecane <n->	Health Hazard	Repeated or prolonged skin contact may irritate or redden skin, progressing to dermatitis. Exposure to high concentrations of vapor may result in headache and stupor. It has a role as a plant metabolite and a volatile oil component.			x
	81	Napthalene,<1-Methyl ->	-	-
	82	2-Nonanol, 2-methylpropionate	-	-
	83	Capric acid	-	-
	84	Decanoic acid, ethyl ester	-	-
	85	Pentadecane	-	-
	86	Farnesene <(E,E)-, alpha->	-	-
	87	Tetradecane <n->	-	-
				Total	22	10	27	11
